# Supplementary material for: Community Structure Analysis of Transcriptional Networks Reveals Distinct Molecular Pathways for Early- and Late-Onset Temporal Lobe Epilepsy with Childhood Febrile Seizures
Source: PubMed Central journal article supplement (PMC4444281; doi:10.1371/journal.pone.0128174), 2015-05-26
Supplement: pone.0128174.s003.pdf [file pone.0128174.s003.pdf]

**Table S1. Early DE interactome network.** Functional description of interactome nodes linked in first and second levels - centered in hubs, high-hubs and VIPs.

| Protein   | PubMed                                                                                                                                                              | Biological Process                             | Shape (border color) |
|-----------|---------------------------------------------------------------------------------------------------------------------------------------------------------------------|------------------------------------------------|----------------------|
| AKTIP     | apoptotic process                                                                                                                                                   | apoptosis                                      | parallelogram        |
| MYC       | cell cycle progression; apoptosis; cellular transformation                                                                                                          |                                                |                      |
| PPP2R2B   | apoptotic process                                                                                                                                                   |                                                |                      |
| TRADD     | induction of apoptosis by extracellular signals; signal transduction                                                                                                |                                                |                      |
| MAP1LC3B  | autophagy/microtubule assembly                                                                                                                                      | autophagy                                      | octagon              |
| SQSTM1    | autophagy; apoptotic process; endosomal transport                                                                                                                   |                                                |                      |
| TBC1D17   | Rab GTPase activator activity                                                                                                                                       |                                                |                      |
| ALB       | Albumin (ALB) functions as a carrier protein for steroids, fatty acids, and thyroid cell processes hormones; plays a role in stabilizing extracellular fluid volume |                                                | circle (pink)        |
| FAM70B    | Official symbol: TMEM255B. Membrane component                                                                                                                       |                                                |                      |
| SPAG5     | cytoplasmic trafficking; spindle organization; cilium formation                                                                                                     |                                                |                      |
| TK1       | nucleotide metabolism                                                                                                                                               |                                                |                      |
| DLST      | glucose metabolism                                                                                                                                                  | cell processes/ bioenergetic systems           | circle (pink)        |
| ESR1      | estrogen receptor alpha/regulator of energy balance                                                                                                                 |                                                |                      |
| RANBP2    | regulation of glucose transport                                                                                                                                     |                                                |                      |
| LAMA4     | regulation of cell adhesion; regulation of cell migration                                                                                                           | cell processes/cell-cell interaction/adhesion  | circle (pink)        |
| MTA3      | zinc ion binding; regulation of cell proliferation                                                                                                                  | cell processes/proliferation                   | circle (pink)        |
| ARL15     | small GTPase mediated signal transduction                                                                                                                           | cell processes/signaling                       | circle (pink)        |
| GPR183    | G protein-coupled receptor; signaling                                                                                                                               |                                                |                      |
| KRT14     | Cell proliferation and differentiation                                                                                                                              | cytoskeleton                                   | circle (green)       |
| TRAF3IP1  | cytoskeletal system protein                                                                                                                                         |                                                |                      |
| FHOD1     | actin binding; positive regulation of stress fiber assembly                                                                                                         | cytoskeleton/actin                             | circle (green)       |
| MAP1LC3A  | microtubule-associated protein                                                                                                                                      | cytoskeleton/tubulin                           | circle (green)       |
| FGFR3     | JAK-STAT cascade                                                                                                                                                    | inflammation/ immune function                  | diamond              |
| IGHA1     | immune response                                                                                                                                                     |                                                |                      |
| IGHG1     | immune response                                                                                                                                                     |                                                |                      |
| MAPK10    | JUN kinase activity; activation of MAPK activity                                                                                                                    |                                                |                      |
| NFKB2     | inflammation and immune function                                                                                                                                    |                                                |                      |
| MTA1      | ubiquitination and acetylation; inflammatory response                                                                                                               | inflammation/ubiquitination                    | diamond              |
| TRPM6     | calcium channel activity                                                                                                                                            | ion channel/voltage-gated channel              | triangle (red)       |
| TRPM7     | calcium channel activity                                                                                                                                            |                                                |                      |
| WNK1      | ATP binding; sodium and chloride ion transport regulator                                                                                                            |                                                |                      |
| BBS1      | nonmotile primary cilium assembly                                                                                                                                   | neuronal development                           | hexagon              |
| BBS4      | alpha-tubulin binding; brain morphogenesis; cerebral cortex development                                                                                             |                                                |                      |
| BBS7      | Recruits Rab8(GTP) to the primary cilium promoting ciliogenesis                                                                                                     |                                                |                      |
| PAFAH1B3  | brain development; nervous system development; lipid metabolic process                                                                                              |                                                |                      |
| TXNRD1    | Brain development; expressed in glia and neuron precursor cells                                                                                                     |                                                |                      |
| APC       | multisubunit E3 ubiquitin ligase controlling cell cycle transition in proliferating cells                                                                           | neuronal development/plasticity                | hexagon              |
| CAV1      | cholesterol transport; neuronal cholesterol homeostasis                                                                                                             |                                                |                      |
| CHN1      | GTPase activator activity; regulation of axonogenesis                                                                                                               |                                                |                      |
| ESR2      | estrogen receptor beta                                                                                                                                              |                                                |                      |
| TUBB2A    | neuron differentiation; learning and memory processes                                                                                                               |                                                |                      |
| DISC1     | microtubule cytoskeleton organization; neuron migration                                                                                                             | neuronal development/plasticity/cell migration | hexagon              |
| EGFR      | cell proliferation; axon guidance; cerebral cortex cell migration; interaction of EGFR and EMP-1 plays a role in the mechanism of drug resistance in epilepsy       |                                                |                      |
| HIF1A     | cell differentiation; neural crest cell migration                                                                                                                   |                                                |                      |
| RAC1      | axon guidance; cell adhesion; cell motility                                                                                                                         |                                                |                      |
| GRB2      | axon elongation; adaptor molecule in several growth factor signaling cascades; neuronal development/plasticity/dendritic growth association with DISC1              |                                                | hexagon              |
| HDAC2     | dendrite development; negative regulation of neuron projection development                                                                                          |                                                |                      |
| KNDC1     | dendrite growth and morphogenesis                                                                                                                                   |                                                |                      |
| MYH14     | neuritogenesis                                                                                                                                                      |                                                |                      |
| BBS2      | brain development; cerebral cortex development; hippocampus development                                                                                             | neuronal development/plasticity/hippocampus    | hexagon              |
| EZH2      | methyltransferase/neurogenesis and memory                                                                                                                           |                                                |                      |
| PTPRS     | cell adhesion; developmental of cerebellum, cerebral cortex, corpus callosum, hippocampus and spinal                                                                |                                                |                      |
| HDAC1     | histone deacetylase activity; negative regulation of apoptosis                                                                                                      | neuroprotection                                | rectangle (red)      |
| IGFBP3    | regulation of apoptotic process                                                                                                                                     |                                                |                      |
| KLF6      | zinc ion binding; positive regulation of transcription                                                                                                              |                                                |                      |
| PARK7     | protects neurons against oxidative stress and cell death; regulation of neuron apoptotic process; membrane depolarization                                           |                                                |                      |
| PSME1     | proteasome activator                                                                                                                                                |                                                |                      |
| RTN2      | neuroprotection; Intracellular vesicular transport; glucose import                                                                                                  |                                                |                      |
| SERPINB9  | anti-apoptosis                                                                                                                                                      |                                                |                      |
| SET       | negative regulation of neuron apoptosis                                                                                                                             |                                                |                      |
| ARRB1     | G-protein coupled receptor internalization; positive regulation of Rho protein signal synaptic transmission transduction                                            |                                                | vee                  |
| CALM1     | calcium-binding; signal transduction                                                                                                                                |                                                |                      |
| CHGB      | large dense core vesicle component                                                                                                                                  |                                                |                      |
| CPE       | peptide hormones/neurotransmitters biosynthesis                                                                                                                     |                                                |                      |
| DLG4      | protein localization to synapse; axon guidance; nervous system development                                                                                          |                                                |                      |
| GTF3C1    | synaptic activation; control of dendritic branching                                                                                                                 |                                                |                      |
| MDM2      | ubiquitin-protein ligase activity; zinc ion binding; synaptic transmission                                                                                          |                                                |                      |
| RABAC1    | proline-rich region binding; synaptic vesicle                                                                                                                       |                                                |                      |
| RIC8A     | G-protein alpha-subunit binding                                                                                                                                     |                                                |                      |
| SYN2      | regulation of epileptic and synaptic activity/plasticity on hippocampus                                                                                             |                                                |                      |
| GABARAP   | GABA receptor binding; synaptic transmission                                                                                                                        | synaptic transmission/GABA                     | vee                  |
| SAT1      | glutamine transporter                                                                                                                                               |                                                |                      |
| GABARAPL1 | GABA receptor binding; autophagy                                                                                                                                    | synaptic transmission/GABA/autophagy           | vee                  |
| GABARAPL2 | GABA receptor binding; autophagy; intra-Golgi vesicle-mediated transport; protein transport                                                                         |                                                |                      |
| ASCC2     | regulation of transcription                                                                                                                                         | transcriptional regulation                     | circle (yellow)      |
| DDX18     | member of the DEAD box protein family; alteration of RNA secondary structure; ATPase activity                                                                       |                                                |                      |

|          |                                                                                     |                                                  |                      |
|----------|-------------------------------------------------------------------------------------|--------------------------------------------------|----------------------|
| EIF2C3   | RNA binding; negative regulation of translation involved in gene silencing by miRNA |                                                  |                      |
| EXOSC8   | rRNA processing                                                                     |                                                  |                      |
| GFI1B    | zinc ion binding; negative regulation of histone H3-K4 methylation                  |                                                  |                      |
| NHP2L1   | snoRNA binding; RNA splicing                                                        |                                                  |                      |
| PRPF38A  | RNA splicing                                                                        |                                                  |                      |
| RBM23    | mRNA processing                                                                     |                                                  |                      |
| RNPC4    | Official Symbol: RBM23. RNA binding protein; mRNA processing                        |                                                  |                      |
| RPA2     | transcription-coupled nucleotide-excision repair                                    |                                                  |                      |
| RPLP1    | RNA metabolic process; translation                                                  |                                                  |                      |
| SUPT5H   | negative regulation of transcription elongation                                     |                                                  |                      |
| TH1L     | negative regulation of transcription                                                |                                                  |                      |
| KDM1A    | histone demethylase activity (H3-K4 specific); chromatin modification               | transcriptional regulation/neurite morphogenesis | circle (yellow)      |
| CHUK     | inhibitor of NF-kappa-B complex                                                     | ubiquitination                                   | parallelogram (pink) |
| ARRB2    | G-protein coupled receptor binding; ubiquitin protein ligase binding                |                                                  |                      |
| PPP1R16A | protein phosphatase 1                                                               |                                                  |                      |
| PSMD11   | protein polyubiquitination                                                          |                                                  |                      |
| UBE2H    | ubiquitin-protein ligase activity                                                   |                                                  |                      |
| RNF5     | RING-finger/control of cell motility/ubiquitination                                 |                                                  |                      |
