# Supplementary material for: Community Structure Analysis of Transcriptional Networks Reveals Distinct Molecular Pathways for Early- and Late-Onset Temporal Lobe Epilepsy with Childhood Febrile Seizures
Source: PubMed Central journal article supplement (PMC4444281; doi:10.1371/journal.pone.0128174), 2015-05-26
Supplement: pone.0128174.s005.pdf [file pone.0128174.s005.pdf]

**Table S3. Early CO interactome network.** Functional description of interactome nodes linked in first and second levels - centered in hubs, high-hubs and VIPs.

| Protein      | PubMed                                                                                                                                                                                     | Biological Process                               | Shape (border color) |
|--------------|--------------------------------------------------------------------------------------------------------------------------------------------------------------------------------------------|--------------------------------------------------|----------------------|
| IFT57        | alias: HIPPI. Apoptotic process; intragagellar transport                                                                                                                                   | apoptosis                                        | parallelogram        |
| MAX          | MYC associated factor X. Involved in cell proliferation, differentiation; apoptosis                                                                                                        |                                                  |                      |
| PNMA1        | neuron- and testis-specific protein; proapoptotic protein in neurons                                                                                                                       |                                                  |                      |
| TRIB3        | negative regulator of NF-kappaB; can also sensitize cells to TNF- and TRAIL-induced apoptosis                                                                                              |                                                  |                      |
| VHL          | neuronal differentiation; neuronal apoptosis                                                                                                                                               |                                                  |                      |
| UBQLN1       | apoptotic process; protein ubiquitination                                                                                                                                                  | apoptosis/ubiquitination                         | parallelogram        |
| SQSTM1       | autophagy; apoptotic process; endosomal transport                                                                                                                                          | autophagy                                        | octagon              |
| CCDC106      | cell differentiation; cell growth                                                                                                                                                          | cell processes                                   | circle (pink)        |
| DDX56        | member of the DEAD box protein family; alteration of RNA secondary structure; ATPase activity                                                                                              |                                                  |                      |
| KRTAP4-12    | keratin-associated protein                                                                                                                                                                 |                                                  |                      |
| MAGEB2       | cell growth control; epigenetic reprogrammed by valproic acid                                                                                                                              |                                                  |                      |
| PTCD3        | component of mitochondrion; mitochondrial translation                                                                                                                                      |                                                  |                      |
| RARA         | regulation of development, differentiation, apoptosis                                                                                                                                      |                                                  |                      |
| RBM38        | Alias: RNPC1. Cell differentiation; cell cycle                                                                                                                                             |                                                  |                      |
| SLX4         | DNA repair and recombination                                                                                                                                                               |                                                  |                      |
| SMC3         | component of the multimeric cohesin complex; chromosome segregation; regulator of RUNX1                                                                                                    |                                                  |                      |
| TREX2        | double-stranded DNA break repair                                                                                                                                                           |                                                  |                      |
| ITGB7        | cell signaling; cell adhesion                                                                                                                                                              | cell processes/cell-cell interaction/adhesion    | circle (pink)        |
| SLC35B2      | solute carrier; transmembrane transport                                                                                                                                                    | cell processes/transport                         | circle (pink)        |
| TTR          | carrier protein for thyroid hormones, cerebrospinal fluid and retinol transport                                                                                                            |                                                  |                      |
| HAUS7        | centrosome and mitotic spindle integrity                                                                                                                                                   | cytoskeleton                                     | circle (green)       |
| ODF2L        | component of cytoskeleton; formation of mother centriole distal/subdistal appendages and generation of primary cilia                                                                       |                                                  |                      |
| PSTPIP1      | scaffold protein and regulator of the actin cytoskeleton                                                                                                                                   | cytoskeleton/actin                               | circle (green)       |
| JUN          | JUN (alias AP-1) activation is associated with increased neuronal cell death                                                                                                               | inflammation/cell death                          | diamond              |
| CEBPB        | regulation of genes involved in immune and inflammatory responses                                                                                                                          | inflammation/immune function                     | diamond              |
| HLA-B        | antigen processing and presentation via MHC class I; immune response                                                                                                                       |                                                  |                      |
| ACPP         | general regulatory partner of Shaw-like K(+) channels (KCNC); acid ion channel/voltage-gated channel phosphatase activity                                                                  |                                                  | triangle (red)       |
| RUNX1        | neuronal differentiation and microglial activation                                                                                                                                         | neuroglia processes                              | rectangle            |
| ASPA         | oligodendrocyte maturation and myelination; glutamatergic synaptic neuroglia processes/oligodendrocyte differentiation activity                                                            |                                                  | rectangle            |
| CNBP         | Aliases: ZNF9 and DM2. Zinc finger protein; sterol-mediated neuronal development transcriptional regulation; brain development                                                             |                                                  | hexagon              |
| MTR          | metabolism of homocysteine, which is involved in epileptogenesis; nervous system development                                                                                               |                                                  |                      |
| ATN1         | central nervous system development; neuron apoptosis; regulation of neuronal development/plasticity neuron differentiation                                                                 |                                                  | hexagon              |
| DAZAP2       | cell signaling and transcription regulation; Wnt/beta-catenin-signalling pathway; posterior neural fate; essential branch of FGF-induced neural patterning                                 |                                                  |                      |
| ERBB2        | nervous system development; glial cell differentiation; axon guidance                                                                                                                      |                                                  |                      |
| GPS2         | interacts with NR3A, linking NMDA receptor activation to suppression of RAS/MAPK-mediated signaling; cell survival; p53 activity modulation                                                |                                                  |                      |
| RAD54L2      | alias ARIP4. Neuronal development                                                                                                                                                          |                                                  |                      |
| TSC22D1      | cell proliferation, differentiation and apoptosis                                                                                                                                          |                                                  |                      |
| ZHX2         | negative regulation of neuron differentiation; zinc finger protein                                                                                                                         |                                                  |                      |
| DISC1        | microtubule cytoskeleton organization; neuron migration                                                                                                                                    | neuronal development/plasticity/cell migration   | hexagon              |
| EGFR         | cell proliferation; axon guidance; cerebral cortex cell migration; interaction of EGFR and EMP-1 plays a role in the mechanism of drug resistance in epilepsy                              |                                                  |                      |
| CDKN2A       | Aliases: p16; INK4A. cell cycle; epigenetic response during nerve regeneration; axonal length                                                                                              | neuronal development/plasticity/dendritic growth | hexagon              |
| SMAD4        | dendritic growth and complexity and neuron cell body size                                                                                                                                  |                                                  |                      |
| CREBZF       | Zhangfei; potential regulator of unfolded protein response                                                                                                                                 | neuroprotection                                  | rectangle (red)      |
| DNAJB2       | neuroprotection; regulation of cell growth; protein ubiquitination                                                                                                                         |                                                  |                      |
| NFKBIA       | member of the NF-kappa-B inhibitor family; inflammatory responses; neurite outgrowth and cell survival                                                                                     |                                                  |                      |
| RPL34        | regulation of CDK5, a mediator of neuronal death and survival                                                                                                                              |                                                  |                      |
| SERPINB2     | neuroprotection induced by synaptic activity                                                                                                                                               |                                                  |                      |
| ATF4         | control of hippocampal GABABR1a and GABABR1b subunit gene expression; response to oxidative stress                                                                                         | response to oxidative stress                     | rectangle (pink)     |
| AFTPH        | clathrin-mediated trafficking in neurons                                                                                                                                                   | synaptic transmission                            | vee                  |
| ANKS1B       | postsynaptic signaling scaffolding protein; cellular component of Cajal body; postsynaptic density and postsynaptic membrane; ephrin receptor binding                                      |                                                  |                      |
| ATXN1        | regulation of excitatory postsynaptic membrane potential                                                                                                                                   |                                                  |                      |
| BDP1         | Rearrangement of nuclear architecture; interacts with TFIIC for synaptic activation and dendritic length and branching control                                                             |                                                  |                      |
| DKFZP667O055 | official name: CRELD2. Interacts with cytoplasmic domain of human neuronal nicotinic acetylcholine receptor; ER stress response; calcium ion binding                                       |                                                  |                      |
| DPYD         | neurotransmission (b-alanine) modulation; electron carrier activity                                                                                                                        |                                                  |                      |
| EEA1         | endosomal trafficking; neurite outgrowth; synaptic plasticity; recycling of synaptic vesicles and neurotransmitter receptors                                                               |                                                  |                      |
| ELF2         | regulation of neurotransmission during endoplasmic reticulum stress                                                                                                                        |                                                  |                      |
| ITGB1        | cell adhesion; synaptic development; axonal outgrowth                                                                                                                                      |                                                  |                      |
| ITGB2        | synaptic contacts and synaptogenesis of hippocampal neurons                                                                                                                                |                                                  |                      |
| ITGB3        | cell adhesion; migration; signaling; modulator of serotonergic systems                                                                                                                     |                                                  |                      |
| VASP         | spine modulation and synapse formation and maturation; spine head enlargement; axon guidance; synaptic plasticity                                                                          |                                                  |                      |
| ERBB4        | morphological and functional development of excitatory synapses in GABAergic neurons                                                                                                       | synaptic transmission/GABA                       | vee                  |
| MCTS1        | carboxylate transporter involved in TLE by influencing brain energy homeostasis; mitochondrial function, GABA-ergic and glutamatergic neurotransmission; flux of lactate through the brain |                                                  |                      |

|           |                                                                                                                       |                                      |                      |
|-----------|-----------------------------------------------------------------------------------------------------------------------|--------------------------------------|----------------------|
| NSF       | GABAB signaling efficacy; synaptic transmission; exocytosis; membrane fusion events; dendritic shaft                  |                                      |                      |
| GABARAP   | GABA receptor binding; synaptic transmission                                                                          |                                      |                      |
| GABARAPL1 | GABA receptor binding; autophagy                                                                                      | synaptic transmission/GABA/autophagy | vee                  |
| GABARAPL2 | GABA receptor binding; autophagy; intra-Golgi vesicle-mediated transport; protein transport                           |                                      |                      |
| SCAMP5    | SNARE complex component; synaptic vesicle membrane component; positive regulation of calcium ion-dependent exocytosis | synaptic transmission/SNARE complex  | vee                  |
| STX6      | vesicle transport and fusion (t-SNARE family); neurite outgrowth                                                      |                                      |                      |
| CLP1      | RNA splicing; mRNA 3'-end processing                                                                                  | transcriptional regulation           | circle (yellow)      |
| DENR      | contains an SUI1 domain; interacts with eIF-2 and directs the ribosome to the proper translation start site           |                                      |                      |
| EIF6      | translation initiation factor                                                                                         |                                      |                      |
| PCF11     | degradation of RNA polymerase II-associated nascent RNA and transcriptional termination                               |                                      |                      |
| POLR2C    | subunit of RNA polymerase II, the polymerase responsible for synthesizing messenger RNA                               |                                      |                      |
| R3HDM     | poly(A) RNA binding                                                                                                   |                                      |                      |
| ZNF212    | gene regulation and development                                                                                       |                                      |                      |
| ZNF664    | zinc finger protein; regulation of transcription                                                                      |                                      |                      |
| UBAC1     | protein ubiquitination                                                                                                | ubiquitination                       | parallelogram (pink) |
