# Supplementary material for: Community Structure Analysis of Transcriptional Networks Reveals Distinct Molecular Pathways for Early- and Late-Onset Temporal Lobe Epilepsy with Childhood Febrile Seizures
Source: PubMed Central journal article supplement (PMC4444281; doi:10.1371/journal.pone.0128174), 2015-05-26
Supplement: pone.0128174.s006.pdf [file pone.0128174.s006.pdf]

**Table S4. Late CO interactome network.** Functional description of interactome nodes linked in first and second levels - centered in hubs, high-hubs and VIPs.

| Protein   | PubMed                                                                                                                          | Biological Process                                     | Shape (border color) |
|-----------|---------------------------------------------------------------------------------------------------------------------------------|--------------------------------------------------------|----------------------|
| CYCS      | initiation of apoptosis                                                                                                         | apoptosis                                              | parallelogram        |
| DFFA      | substrate for caspase-3 and triggers DNA fragmentation during apoptosis                                                         |                                                        |                      |
| PPP2R1A   | apoptosis and endoplasmic reticulum (ER) stress associated protein                                                              |                                                        |                      |
| PPP2R2B   | apoptotic process                                                                                                               |                                                        |                      |
| RPS3A     | transcription; metastasis; DNA repair; apoptosis                                                                                |                                                        |                      |
| STK24     | MAPK signaling; programmed cells death                                                                                          |                                                        |                      |
| TP53      | DNA repair; apoptotic process; cellular stress response                                                                         |                                                        |                      |
| YWHAQ     | apoptotic process                                                                                                               |                                                        |                      |
| DFFB      | apoptotic process in hippocampus; intracellular signal transduction                                                             | apoptosis/hippocampus                                  | parallelogram        |
| GABARAPL2 | GABA receptor binding; autophagy; intra-Golgi vesicle-mediated transport; protein transport                                     | autophagy/synaptic transmission/GABA                   | octagon              |
| ECHS1     | hydration of 2-trans-enoyl-coenzyme A (CoA) intermediates                                                                       | cell processes                                         | circle (pink)        |
| GNL2      | GTP catabolic process; ribosome biogenesis                                                                                      |                                                        |                      |
| GOT2      | Glutamic-oxaloacetic transaminase; amino acid metabolisms                                                                       |                                                        |                      |
| LRRCS59   | cellular component of endoplasmic reticulum membrane                                                                            |                                                        |                      |
| NAP1L1    | DNA replication; positive regulation of cell proliferation                                                                      |                                                        |                      |
| PAICS     | purine nucleobase biosynthetic process                                                                                          |                                                        |                      |
| PCNA      | RAD6-dependent DNA repair; cell proliferation; cell cycle                                                                       |                                                        |                      |
| ROD1      | Official Symbol: PTBP3. Regulator of cell differentiation                                                                       |                                                        |                      |
| TMEM33    | transmembrane protein; component of melanosome                                                                                  |                                                        |                      |
| ESR1      | estrogen receptor alpha/regulator of energy balance                                                                             | cell processes/ bioenergetic systems                   | circle (pink)        |
| TKT       | channeling of excess sugar phosphates to glycolysis; energy reserve metabolic process                                           |                                                        |                      |
| HSPE1     | heat shock protein which functions as a chaperonin                                                                              | cell processes/chaperonin                              | circle (pink)        |
| OLFM2     | interactor of Smad3                                                                                                             | cell processes/signaling                               | circle (pink)        |
| YWHAB     | signal transduction/14-3-3 protein family                                                                                       |                                                        |                      |
| EPB41     | cytoskeletal network                                                                                                            | cytoskeleton                                           | circle (green)       |
| MAEA      | cytoskeleton organization                                                                                                       |                                                        |                      |
| FSCN1     | formation of actin-based cellular protrusions; cell migration; motility; adhesion; interactions                                 | cytoskeleton/actin                                     | circle (green)       |
| MTPN      | actin-driven cell movements and motility during neuronal development                                                            |                                                        |                      |
| PXN       | cytoskeleton organization; actin-membrane attachment                                                                            |                                                        |                      |
| RHPN2     | (Rho)-GTPase binding protein; actin cytoskeleton organization                                                                   |                                                        |                      |
| WAS       | actin cytoskeletal organizing                                                                                                   |                                                        |                      |
| YWHAZ     | 14-3-3 protein; cofilin-based regulation of actin filament dynamics; synaptic plasticity                                        |                                                        |                      |
| CACYBP    | calyculin (S100A6) binding neuronal protein; organization of microtubules                                                       | cytoskeleton/tubulin-associated                        | circle (green)       |
| RUVBL1    | tubulin association; centrosome                                                                                                 |                                                        |                      |
| TACC2     | cellular growth and differentiation; centrosomal microtubule stabilization; microtubule organization                            |                                                        |                      |
| MBNL1     | splicing of microtubule-associated protein Tau                                                                                  | cytoskeleton/tubulin-associated                        | circle (green)       |
| TNF       | inflammation                                                                                                                    | inflammation/cell death                                | diamond              |
| ANXA2     | microtubule-associated tau protein stabilization in cortex neurons; inflammation; S100A10 binding                               | inflammation/immune function                           | diamond              |
| MIF       | cell-mediated immunity; immunoregulation; inflammation                                                                          |                                                        |                      |
| AGER      | Alias: RAGE. Receptor for advanced glycation end-products; apoptosis; inflammation                                              | inflammation/neuroglia processes                       | diamond              |
| S100A11   | Ca2(+)-binding protein                                                                                                          | ion binding                                            | triangle             |
| KCNH1     | potassium voltage-gated channel                                                                                                 | ion channel/voltage-gated channel                      | triangle (red)       |
| S100A6    | Calcyclin. Calcium binding protein; upregulation involved in neuronal degeneration; interactor                                  | neuroglia processes                                    | rectangle            |
| S100B     | astroglial activation; neuronal synaptic plasticity; axonogenesis; central nervous system development; learning and memory      |                                                        |                      |
| TSEN2     | tRNA splicing endonuclease subunit involved in brain development                                                                | neuronal development                                   | hexagon              |
| BMPR2     | brain development; hippocampal neuronal plasticity upon brain injury                                                            | neuronal development/plasticity                        | hexagon              |
| CSK       | c-src tyrosine kinase; calcium channel sparklet activity regulation; regulation of NMDAR                                        |                                                        |                      |
| ERBB2     | nervous system development; glial cell differentiation; axon guidance                                                           |                                                        |                      |
| HPRT1     | specification and development of neurons                                                                                        |                                                        |                      |
| ITGAV     | cell adhesion; migration; axon guidance                                                                                         |                                                        |                      |
| LCK       | Src kinase-family; expressed in neurons of the hippocampus                                                                      |                                                        |                      |
| PPFIBP1   | axon guidance; synapse development                                                                                              |                                                        |                      |
| STK38     | Alias: NDR. Neuron fate specification and circuit formation; dendrite morphogenesis                                             |                                                        |                      |
| TAGLN2    | neuron development; estrogen-regulated                                                                                          |                                                        |                      |
| ZIC5      | neuronal development                                                                                                            |                                                        |                      |
| CBR1      | NADPH-dependent oxidoreductase; neurite outgrowth via activation                                                                | Stat3 neuronal development/plasticity/dendritic growth | hexagon              |
| CDKN2A    | Aliases: p16; INK4A. cell cycle; epigenetic response during nerve regeneration; axonal length                                   |                                                        |                      |
| PRKG1     | neurite outgrowth; mediators of the nitric oxide/cGMP signaling pathway; spinal synaptic potentiation and pain hypersensitivity |                                                        |                      |
| PTPRZ1    | neuritogenesis regulation; neuronal reorganization in hippocampus                                                               |                                                        |                      |

|         |                                                                                                                                                                                           |                            |                      |
|---------|-------------------------------------------------------------------------------------------------------------------------------------------------------------------------------------------|----------------------------|----------------------|
| RANBP1  | Ran GTPase system; importin-dependent transport and signaling; cytoskeleton dynamics; neurite outgrowth in mammalian neuron                                                               |                            |                      |
| SMAD4   | dendritic growth and complexity and neuron cell body size                                                                                                                                 |                            |                      |
| WDR36   | Axon outgrowth                                                                                                                                                                            |                            |                      |
| G3BP2   | expression level altered in temporal lobe epilepsy; signal transduction; neuroprotection transport; stress granule formation                                                              |                            | rectangle (red)      |
| P4HB    | Aliase: PDI. Act as a chaperone; neuroprotection; subunit of the microsomal triglyceride transfer protein complex                                                                         |                            |                      |
| PHB2    | neuronal survival                                                                                                                                                                         |                            |                      |
| PIN1    | neuronal differentiation and survival; stress response                                                                                                                                    |                            |                      |
| SFN     | signal transduction/14-3-3 protein family                                                                                                                                                 |                            |                      |
| SULT1E1 | catalyzes sulfate conjugation of neurotransmitters and hormones; neuroprotection/cholesterol metabolism control levels of estrogen receptors; metabolism of cholesterol and neurosteroids |                            | rectangle (red)      |
| ABL1    | synaptic structure and function regulation; synapse formation in synaptic transmission neurons                                                                                            |                            | vee                  |
| ARRB1   | G-protein coupled receptor internalization; positive regulation of Rho protein signal transduction                                                                                        |                            |                      |
| DLG4    | protein localization to synapse; axon guidance; nervous system development                                                                                                                |                            |                      |
| GDI1    | regulate the GDP-GTP exchange reaction of Rab family members, involved in vesicular trafficking; membrane transport in neurons                                                            |                            |                      |
| ITGB3   | cell adhesion; migration; signaling; modulator of serotonergic systems                                                                                                                    |                            |                      |
| MDM2    | ubiquitin-protein ligase activity; zinc ion binding; synaptic transmission                                                                                                                |                            |                      |
| PEBP1   | Aliase: HCNP. Regulation of neurotransmitter levels; stimulates enzymatic activity of choline acetyltransferase in neurons                                                                |                            |                      |
| S100A1  | Ca2+-dependent regulation of synaptic vesicle trafficking; endocytosis; axonal projection; neuroplasticity                                                                                |                            |                      |
| YWHAG   | 14-3-3 protein; regulation of neuron differentiation; regulation of synaptic plasticity                                                                                                   |                            |                      |
| PPIB    | cyclophilin B. Presynaptic function; membrane trafficking of GABA synaptic transmission/GABA receptors                                                                                    |                            | vee                  |
| CELF1   | Aliase: BRUNOL2. mRNA editing                                                                                                                                                             | transcriptional regulation | circle (yellow)      |
| CLP1    | RNA splicing; mRNA 3'-end processing                                                                                                                                                      |                            |                      |
| EIF1    | translation initiation factor                                                                                                                                                             |                            |                      |
| EIF1B   | translation initiation factor                                                                                                                                                             |                            |                      |
| EWSR1   | RNA processing and transport                                                                                                                                                              |                            |                      |
| FTSJ1   | RNA processing and modification; hypoeexpression associated to intellectual disability, language delay, autistic behaviors, and seizures                                                  |                            |                      |
| HNRNPH1 | mRNA processing; splicing regulator                                                                                                                                                       |                            |                      |
| HNRNPR  | mRNA processing; splicing regulator                                                                                                                                                       |                            |                      |
| LARP4   | cell morphogenesis; mRNA homeostasis                                                                                                                                                      |                            |                      |
| MLXIP   | regulation of genes in response to cellular glucose levels                                                                                                                                |                            |                      |
| NOP56   | rRNA processing                                                                                                                                                                           |                            |                      |
| RBBP4   | histone acetylation and chromatin assembly; transcriptional repression of E2F-responsive genes                                                                                            |                            |                      |
| RPS11   | ribosomal protein S11                                                                                                                                                                     |                            |                      |
| RPS9    | regulation of cell proliferation; regulation of translation                                                                                                                               |                            |                      |
| SLIRP   | steroid receptor RNA activator interaction; regulation of transcription                                                                                                                   |                            |                      |
| U2AF2   | regulation of transcription; mRNA processing                                                                                                                                              |                            |                      |
| ARRB2   | G-protein coupled receptor binding; ubiquitin protein ligase binding                                                                                                                      | ubiquitination             | parallelogram (pink) |
| PMPCA   | proteolysis                                                                                                                                                                               |                            |                      |
| PSMA1   | member of multicatalytic proteinase complex (proteasome), subunit alpha type, 1                                                                                                           |                            |                      |
| PSMA6   | member of multicatalytic proteinase complex (proteasome), subunit alpha type, 6                                                                                                           |                            |                      |
| PSMB1   | member of multicatalytic proteinase complex (proteasome), subunit beta type, 1                                                                                                            |                            |                      |
| PSMB3   | member of multicatalytic proteinase complex (proteasome), subunit beta type, 3                                                                                                            |                            |                      |
| PSMB5   | member of multicatalytic proteinase complex (proteasome), subunit beta type, 5                                                                                                            |                            |                      |
| PSME3   | member of multicatalytic proteinase complex (proteasome), subunit 3                                                                                                                       |                            |                      |
| RMND5B  | Aliase: GID2. Degradation of gluconeogenic enzymes via ubiquitin proteasome                                                                                                               |                            |                      |
| UBE2D2  | protein binding; ubiquitination                                                                                                                                                           |                            |                      |
| UBE2D3  | apoptotic process; protein ubiquitination                                                                                                                                                 |                            |                      |
| UBE2D4  | protein ubiquitination                                                                                                                                                                    |                            |                      |
| UBE2E1  | cell cycle; ubiquitination                                                                                                                                                                |                            |                      |
| UBE2E3  | protein ubiquitination; regulation of growth                                                                                                                                              |                            |                      |
| UBE2W   | protein ubiquitination                                                                                                                                                                    |                            |                      |
| USP10   | protein ubiquitination; proteolysis                                                                                                                                                       |                            |                      |
