# Supplementary material for: Community Structure Analysis of Transcriptional Networks Reveals Distinct Molecular Pathways for Early- and Late-Onset Temporal Lobe Epilepsy with Childhood Febrile Seizures
Source: PLoS One. 2015 May 26;10(5):e0128174. doi: 10.1371/journal.pone.0128174 (PMC4444281; doi:10.1371/journal.pone.0128174)
Supplement: S2 Table — Functional description of interactome nodes linked in first and second levels; centered in hubs, high-hubs and VIPs. (PDF) [file pone.0128174.s004.pdf]

**Table S2. Late DE interactome network.** Functional description of interactome nodes linked in first and second levels - centered in hubs, high-hubs and VIPs.

| Protein   | PubMed                                                                                                                                                                | Biological Process                               | Shape (border color) |
|-----------|-----------------------------------------------------------------------------------------------------------------------------------------------------------------------|--------------------------------------------------|----------------------|
| MYC       | cell cycle progression; apoptosis; cellular transformation                                                                                                            | apoptosis                                        | parallelogram        |
| PPP2CA    | induction of apoptosis; mesoderm development; regulation of Wnt receptor signaling pathway                                                                            |                                                  |                      |
| PPP2R5E   | apoptotic process                                                                                                                                                     |                                                  |                      |
| RYBP      | apoptotic process; histone H2A monoubiquitination; multicellular organismal development                                                                               |                                                  |                      |
| TRAF2     | autophagy                                                                                                                                                             | autophagy                                        | octagon              |
| AURKB     | serine/threonine kinase                                                                                                                                               | cell processes                                   | circle (pink)        |
| CENPT     | centromere assembly                                                                                                                                                   |                                                  |                      |
| FHIT      | nucleic acid metabolism                                                                                                                                               |                                                  |                      |
| GOLGB1    | Golgi organization                                                                                                                                                    |                                                  |                      |
| MAGEA11   | melanoma antigen family A; primate-specific steroid receptor coregulator                                                                                              |                                                  |                      |
| MUC7      | mucin peptide; O-glycan processing; cellular protein metabolic process                                                                                                |                                                  |                      |
| RAB11FIP4 | endosomal recycling regulation                                                                                                                                        |                                                  |                      |
| SPAG5     | cytoplasmic trafficking; spindle organization; cilium formation                                                                                                       |                                                  |                      |
| WDR47     | multicellular organismal development                                                                                                                                  |                                                  |                      |
| ESR1      | estrogen receptor alpha/regulator of energy balance                                                                                                                   | cell processes/bioenergetic systems              | circle (pink)        |
| TMEM2     | cell movement and tissue morphogenesis                                                                                                                                | cell processes/cell migration                    | circle (pink)        |
| FDXR      | iron-sulfur cluster biogenesis; maintenance of cytosolic and mitochondrial iron homeostasis                                                                           | cell processes/iron homeostasis                  | circle (pink)        |
| SH3KBP1   | apoptosis; cytoskeletal rearrangement; cell adhesion; regulation of clathrin-dependent endocytosis                                                                    | cell processes/neuronal migration                | circle (pink)        |
| MTA3      | zinc ion binding; regulation of cell proliferation                                                                                                                    | cell processes/proliferation                     | circle (pink)        |
| CCDC85B   | cell differentiation; cell growth                                                                                                                                     | cell processes/proliferation/differentiation     | circle (pink)        |
| CD2AP     | signal transduction; cell migration; cell extension; cell cycle                                                                                                       |                                                  |                      |
| DYNLT3    | protein binding; cell cycle                                                                                                                                           |                                                  |                      |
| TAX1BP3   | signal transduction; cell proliferation                                                                                                                               |                                                  |                      |
| FBF1      | protein binding                                                                                                                                                       | cell processes/protein binding                   | circle (pink)        |
| CCDC91    | G-protein signaling in the development and maintenance of white matter microstructure                                                                                 | cell processes/signaling                         | circle (pink)        |
| GPR183    | G protein-coupled receptor; signaling                                                                                                                                 |                                                  |                      |
| PIK3R3    | regulation of phosphorylation                                                                                                                                         |                                                  |                      |
| RAB11FIP3 | endosomal trafficking during cytokinesis                                                                                                                              |                                                  |                      |
| YWHAB     | signal transduction/14-3-3 protein family                                                                                                                             |                                                  |                      |
| FAM116B   | Official symbol: DENND6B; Rab-mediated trafficking pathway                                                                                                            | cell processes/transport                         | circle (pink)        |
| ACTR3B    | actin binding; cell motility                                                                                                                                          | cytoskeleton/actin                               | circle (green)       |
| ARPC4     | actin filament binding; cell motility                                                                                                                                 |                                                  |                      |
| ARPC5L    | regulation of actin filament polymerization                                                                                                                           |                                                  |                      |
| CAPZA2    | actin cytoskeleton organization                                                                                                                                       |                                                  |                      |
| MICAL3    | regulation of actin microfilaments                                                                                                                                    |                                                  |                      |
| DYNLL1    | intracellular transport and motility                                                                                                                                  | cytoskeleton/cell motility                       | circle (green)       |
| KIF23     | mitotic spindle elongation; microtubule movement                                                                                                                      | cytoskeleton/tubulin                             | circle (green)       |
| MTA1      | ubiquitination and acetylation; inflammatory response                                                                                                                 | inflammation/ubiquitination                      | diamond              |
| CABP1     | regulation of voltage-gated calcium channel activity                                                                                                                  | ion channel/voltage-gated channel                | triangle (red)       |
| CACNA1C   | Calcium channel; learning; memory and brain plasticity; disturbance of long-term potentiation                                                                         |                                                  |                      |
| CACNB2    | voltage-dependent calcium channel protein/calcium channel activity; neuromuscular junction development                                                                |                                                  |                      |
| SLC26A8   | anion transport; chloride transport                                                                                                                                   |                                                  |                      |
| MARK3     | phosphorylation of tau proteins MAP2 and MAP4                                                                                                                         | neurodegeneration                                | rectangle (green)    |
| EFHD2     | Conserved calcium-binding protein, abundant within the central nervous system; EFhd2 may play an important role in the pathobiology of tau-mediated neurodegeneration | neurodegeneration/ion-binding/Ca+2 binding       | rectangle (green)    |
| CAMKV     | calmodulin-binding, vesicle-associated protein kinase in axons and dendrites                                                                                          | neuronal development                             | hexagon              |
| CRKL      | activate the RAS and JUN kinase signaling pathways; regulation of postnatal hippocampal dendritogenesis                                                               |                                                  |                      |
| DAG1      | microtubule anchoring; dual receptor for agrin and laminin-2 in the Schwann cell membrane; dendrite orientation; neuronal migration                                   | neuronal development/plasticity                  | hexagon              |
| ECT2      | nervous system development; positive regulation of neuron differentiation; apoptotic process; cell cycle, differentiation and morphogenesis;                          |                                                  |                      |
| RAI1      | induced by retinoic acid; neuron development; learning and memory                                                                                                     |                                                  |                      |
| SHCBP1    | regulation of neural precursor cell proliferation                                                                                                                     |                                                  |                      |
| TESC      | EF-hand protein with a single Ca2+-binding site; interacts with calcineurin                                                                                           |                                                  |                      |
| TTLL3     | axoneme assembly; cilium assembly                                                                                                                                     |                                                  |                      |
| TUBB      | neuronal differentiation; cell viability; cytoskeleton structure                                                                                                      |                                                  |                      |
| HIF1A     | cell differentiation; neural crest cell migration                                                                                                                     | neuronal development/plasticity/cell migration   | hexagon              |
| RACGAP1   | neuronal proliferation; cell migration; cytoskeletal reorganization; cell cycle regulation                                                                            |                                                  |                      |
| CDK1      | regulation of Schwann cell differentiation; cell cycle control; neurite outgrowth                                                                                     | neuronal development/plasticity/dendritic growth | hexagon              |
| CELSR3    | calcium ion binding; neuron migration; neuropeptide signaling pathway; axonal fasciculation                                                                           |                                                  |                      |
| GRB2      | axon elongation; adaptor molecule in several growth factor signaling cascades; association with DISC1                                                                 |                                                  |                      |
| HDAC2     | dendrite development; negative regulation of neuron projection development                                                                                            |                                                  |                      |
| LAMA5     | Matrix glycoprotein; cell adhesion; differentiation; migration; signaling; neurite outgrowth                                                                          |                                                  |                      |
| LAMB1     | cell adhesion; differentiation; migration; signaling; neurite outgrowth                                                                                               |                                                  |                      |
| LAMB2     | cell adhesion; differentiation; migration; signaling; neurite outgrowth                                                                                               |                                                  |                      |
| LAMC1     | cell adhesion; differentiation; migration; signaling; neurite outgrowth; axon myelination                                                                             |                                                  |                      |
| LAMC2     | cell adhesion; differentiation; migration; signaling; neurite outgrowth                                                                                               |                                                  |                      |
| LAMC3     | cell adhesion; differentiation; migration; signaling; neurite outgrowth                                                                                               |                                                  |                      |
| SIRT1     | axonal elongation, neurite outgrowth, dendritic branching                                                                                                             |                                                  |                      |
| SMAD2     | dendritic growth and complexity and neuron cell body size                                                                                                             |                                                  |                      |
| AKT1S1    | neuroprotection                                                                                                                                                       | neuroprotection                                  | rectangle (red)      |

|           |                                                                                                                           |                                                  |                      |
|-----------|---------------------------------------------------------------------------------------------------------------------------|--------------------------------------------------|----------------------|
| BMI1      | Polycomb transcriptional repressor, is implicated in cell cycle regulation and cell senescence.                           |                                                  |                      |
| BTBD10    | Akt interactor; regulation of neuron survival                                                                             |                                                  |                      |
| DNAJB9    | protection of stressed cells from apoptosis                                                                               |                                                  |                      |
| HDAC1     | histone deacetylase activity; negative regulation of apoptosis                                                            |                                                  |                      |
| HSPD1     | chaperone-mediated protein complex assembly                                                                               |                                                  |                      |
| MEGF10    | cell adhesion; cell projection; mediator of astrocyte phagocytosis                                                        |                                                  |                      |
| PARK7     | protects neurons against oxidative stress and cell death; regulation of neuron apoptotic process; membrane depolarization |                                                  |                      |
| PHC2      | neuronal survival                                                                                                         |                                                  |                      |
| RTN2      | neuroprotection; Intracellular vesicular transport; glucose import                                                        |                                                  |                      |
| SET       | negative regulation of neuron apoptosis                                                                                   |                                                  |                      |
| SFN       | signal transduction/14-3-3 protein family                                                                                 |                                                  |                      |
| ATF7IP    | control of hippocampal GABABR1a and GABABR1b subunit gene expression; response to oxidative stress                        |                                                  | rectangle (pink)     |
| CALM1     | calcium-binding; signal transduction                                                                                      | synaptic transmission                            | vee                  |
| DLG4      | protein localization to synapse; axon guidance; nervous system development                                                |                                                  |                      |
| SH3GL2    | synaptic vesicle endocytosis; axon guidance; central nervous system development                                           |                                                  |                      |
| YWHAG     | 14-3-3 protein; regulation of neuron differentiation; regulation of synaptic plasticity                                   |                                                  |                      |
| NSF       | GABAB signaling efficacy; synaptic transmission; exocytosis; membrane fusion events; dendritic shaft                      | synaptic transmission/GABA                       | vee                  |
| GABARAP   | GABA receptor binding; synaptic transmission                                                                              |                                                  |                      |
| GABARAPL1 | GABA receptor binding; autophagy                                                                                          | synaptic transmission/GABA/autophagy             | vee                  |
| GABARAPL2 | GABA receptor binding; autophagy; intra-Golgi vesicle-mediated transport; protein transport                               |                                                  |                      |
| STX8      | vesicle transport and fusion (t-SNARE family); neurite outgrowth                                                          | synaptic transmission/SNARE complex              | vee                  |
| VTG1B     | Neuronal development; axon morphology; endosomal membrane trafficking (SNARE complex)                                     |                                                  |                      |
| SNX25     | TGF-beta signaling; development of temporal lobe epilepsy                                                                 | synaptic transmission/TLE                        | vee                  |
| BCOR      | heat shock protein binding; chromatin modification                                                                        | transcriptional regulation                       | circle (yellow)      |
| CBX2      | chromatin remodeling and modification of histones; regulation of transcription                                            |                                                  |                      |
| CBX7      | regulation of transcription                                                                                               |                                                  |                      |
| DDX18     | member of the DEAD box protein family; alteration of RNA secondary structure; ATPase activity                             |                                                  |                      |
| E2F6      | transcription factor; cell cycle control                                                                                  |                                                  |                      |
| FHL1      | zinc finger protein                                                                                                       |                                                  |                      |
| HDAC3     | histone deacetylation; chromatin modification                                                                             |                                                  |                      |
| HMG20A    | regulation of transcription, DNA-dependent                                                                                |                                                  |                      |
| PCGF1     | histone H2A monoubiquitination; regulation of transcription                                                               |                                                  |                      |
| PCGF2     | negative regulator of transcription (Polycomb group)                                                                      |                                                  |                      |
| PRC1      | regulation of transcription (Polycomb group)                                                                              |                                                  |                      |
| RING1     | Transcriptional repressor/activator (Polycomb group); metal ion binding                                                   |                                                  |                      |
| RPA1      | transcription-coupled nucleotide-excision repair                                                                          |                                                  |                      |
| TCEA2     | Alias: TFIIIS. SII class transcription elongation factor                                                                  |                                                  |                      |
| TH1L      | negative regulation of transcription                                                                                      |                                                  |                      |
| ZMYM3     | gene silencing; zinc ion binding;                                                                                         |                                                  |                      |
| KDM1A     | histone demethylase activity (H3-K4 specific); chromatin modification                                                     | transcriptional regulation/neurite morphogenesis | circle (yellow)      |
| RNF2      | RING-finger/control of cell motility/ubiquitination                                                                       | ubiquitination                                   | parallelogram (pink) |
| RPS27A    | ubiquitin pathway                                                                                                         |                                                  |                      |
| ARRB2     | G-protein coupled receptor binding; ubiquitin protein ligase binding                                                      |                                                  |                      |
| DCAF10    | protein ubiquitination                                                                                                    |                                                  |                      |
| HIP2      | Official Symbol: UBE2K. Suppression of apoptosis; ubiquitin-dependent protein catabolic process                           |                                                  |                      |
| PRSS23    | proteolysis                                                                                                               |                                                  |                      |
| TNK2      | protein ubiquitination; regulation of clathrin-mediated endocytosis; signal transduction                                  |                                                  |                      |
| UBE2D1    | positive regulation of protein ubiquitination; cell cycle                                                                 |                                                  |                      |
| UBE2D2    | protein binding; ubiquitination                                                                                           |                                                  |                      |
| UBE2D3    | apoptotic process; protein ubiquitination                                                                                 |                                                  |                      |
| UBE2D4    | protein ubiquitination                                                                                                    |                                                  |                      |
| UBE2E1    | cell cycle; ubiquitination                                                                                                |                                                  |                      |
| UBE2E2    | protein ubiquitination                                                                                                    |                                                  |                      |
| UBE2E3    | protein ubiquitination; regulation of growth                                                                              |                                                  |                      |
| USP11     | protein ubiquitination; proteolysis                                                                                       |                                                  |                      |
| USP7      | protein deubiquitination; apoptosis; multicellular organismal development;                                                |                                                  |                      |
